CORRECTION

# Correction: Impact of early-onset persistent stunting on cognitive development at 5 years of age: Results from a multi-country cohort study

Md Ashraful Alam, Stephanie A Richard, Shah Mohammad Fahim, Mustafa Mahfuz, Baitun Nahar, Subhasish Das, Binod Shrestha, Beena Koshy, Estomih Mduma, Jessica C Seidman, Laura E Murray-Kolb, Laura E Caulfield, Aldo A. M Lima, Pascal Bessong, Tahmeed Ahmed

Aldo A. M. Lima and Pascal Bessong are not included in the author byline. Aldo A. M. Lima should be listed as the thirteenth author and affiliated with Clinical Research Unit and Institute of Biomedicine, Federal University of Ceara, Fortaleza, Brazil. The contributions of this author are as follows: Conceptualization, Data Curation, Investigation, Methodology and Writing – Review & Editing. Pascal Bessong should be listed at the fourteenth author and affiliated with the University of Venda, Thohoyandou, South Africa. The contributions of this author are as follows: Conceptualization, Data Curation, Investigation, Methodology and Writing – Review & Editing.

## Reference

1. Alam MA, Richard SA, Fahim SM, Mahfuz M, Nahar B, Das S, et al. (2020) Impact of early-onset persistent stunting on cognitive development at 5 years of age: Results from a multi-country cohort study. PLoS ONE 15(1): e0227839. <https://doi.org/10.1371/journal.pone.0227839> PMID: 31978156

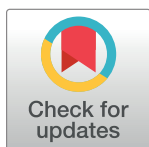

## OPEN ACCESS

**Citation:** Alam MA, Richard SA, Fahim SM, Mahfuz M, Nahar B, Das S, et al. (2020) Correction: Impact of early-onset persistent stunting on cognitive development at 5 years of age: Results from a multi-country cohort study. PLoS ONE 15(2): e0229663. <https://doi.org/10.1371/journal.pone.0229663>

**Published:** February 20, 2020

**Copyright:** © 2020 Alam et al. This is an open access article distributed under the terms of the [Creative Commons Attribution License](https://creativecommons.org/licenses/by/4.0/), which permits unrestricted use, distribution, and reproduction in any medium, provided the original author and source are credited.
